# Supplementary material for: tPA‐MMP‐9 Axis Plays a Pivotal Role in Mobilization of Endothelial Progenitor Cells from Bone Marrow to Circulation and Ischemic Region for Angiogenesis
Source: Hindawi journal article supplement (doi:10.1155/2016/5417565), 2016-01-01
Supplement: f1 [file 5417565.f1.pdf]

## Supplemental data

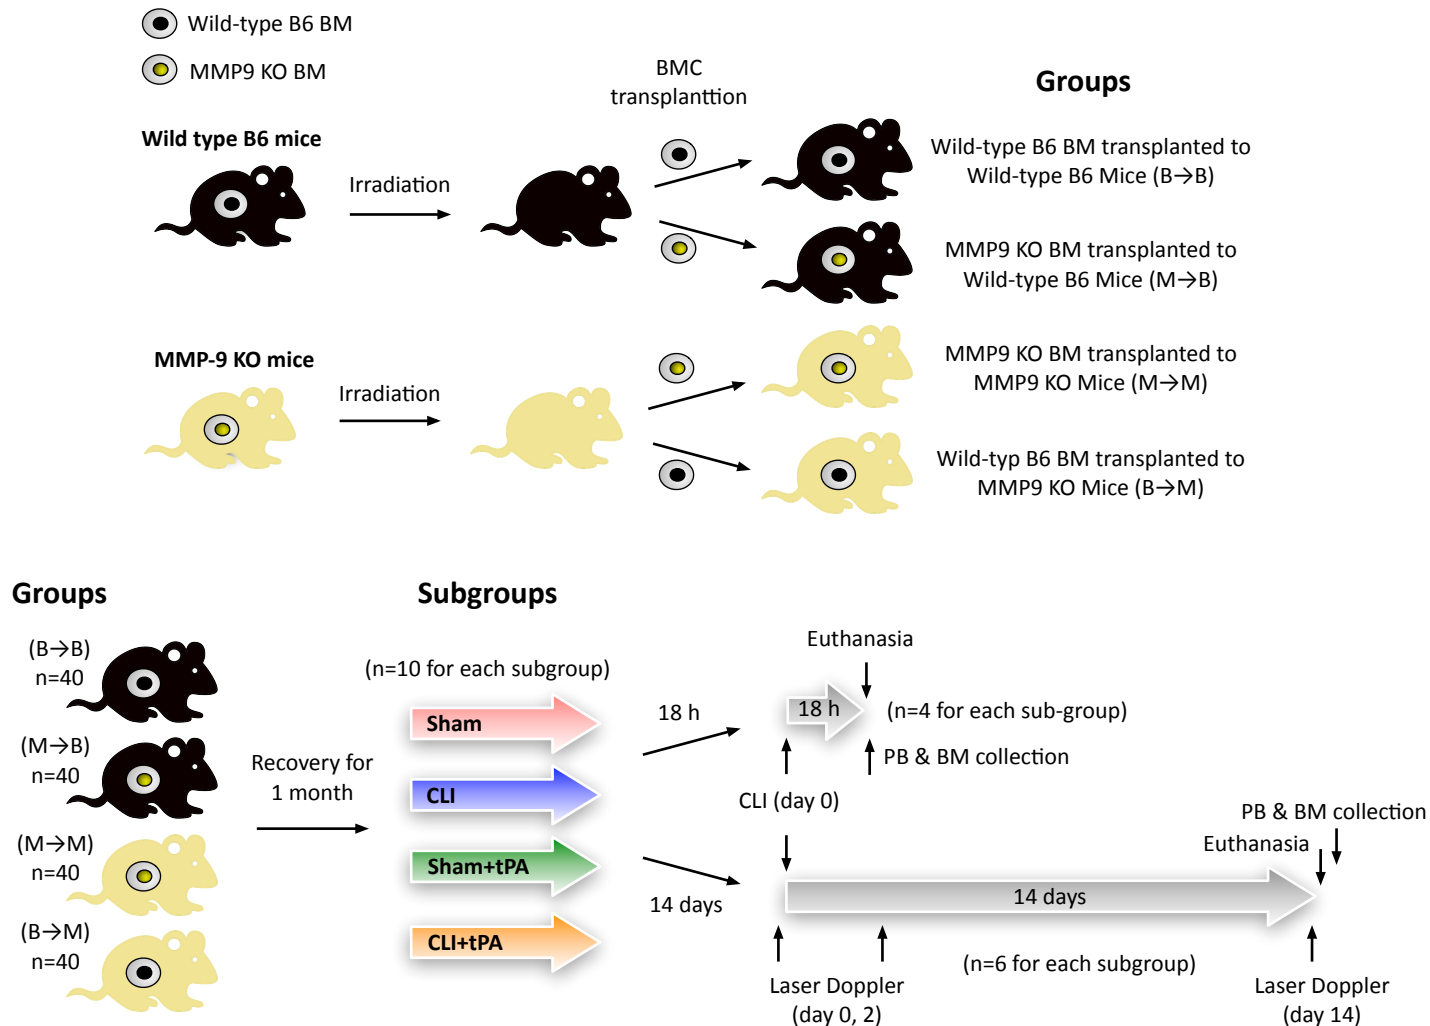

**Supplemental Figure 1**

**Experimental grouping and design of present study.** Upper panel: The schematic illustration of the grouping for the bone marrow cell (BMC) transplantation model. Lower panel: The schematic illustration of experimental grouping and procedures for BMC transplantation, critical limb ischemia (CLI) induction, blood flow observation, and sample collection. MMP-9, matrix metalloproteinase-9; PB, peripheral blood; BM, bone marrow.
